## CORRECTION

# Correction: A single-plasmid approach for genome editing coupled with long-term lineage analysis in chick embryos

**Shashank Gandhi, Yuwei Li, Weiyi Tang, Jens B. Christensen, Hugo A. Urrutia, Felipe M. Vieceli, Michael L. Piacentino and Marianne E. Bronner**

There was an error in Development (2021) **148**, dev193565 (doi:10.1242/dev.193565).

In the supplementary Materials and Methods, the HDV-NotI-Rev primer was incorrect.

### **Corrected:**

HDV-NotI-Rev: 5' - aaagggccgcGTCCCATTCGCCATGCCGAA - 3'

### **Original:**

HDV-NotI-Rev: 5' - aaaGAATTCtgggagCTGATGAGTCCGTGAGGACG - 3'

The PDF version of the supplementary information has been corrected.

The authors apologise to the readers for these errors and any inconvenience they may have caused.
